# Supplementary material for: Feasibility of Sentinel Node Biopsy in Head and Neck Melanoma Using a Hybrid Radioactive and Fluorescent Tracer
Source: PubMed Central journal article supplement — Ann Surg Oncol. 2011 Dec 30;19(6):1988–94. doi: 10.1245/s10434-011-2180-7 (PMC3356513; doi:10.1245/s10434-011-2180-7), 2011-12-30
Supplement: 10434_2011_2180_MOESM1_ESM.pdf [file 10434_2011_2180_MOESM1_ESM.pdf]

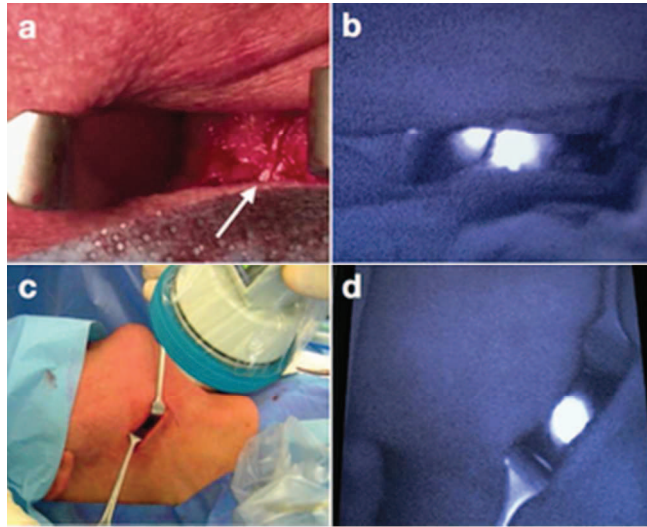

See Table & Figure legends.doc

FIG. S1 Visualization of the fluorescent component of the hybrid tracer in sentinel nodes in the neck region. a, b The near-infrared light camera reveals the sentinel node underneath a thin layer of muscle and covered by a small vein (arrow). c, d Another non-blue sentinel node is clearly visualized using the fluorescence camera  
27x22mm (300 x 300 DPI)
