# Supplementary material for: Feasibility of Sentinel Node Biopsy in Head and Neck Melanoma Using a Hybrid Radioactive and Fluorescent Tracer
Source: PubMed Central journal article supplement — Ann Surg Oncol. 2011 Dec 30;19(6):1988–94. doi: 10.1245/s10434-011-2180-7 (PMC3356513; doi:10.1245/s10434-011-2180-7), 2011-12-30
Supplement: 10434_2011_2180_MOESM2_ESM.pdf [file 10434_2011_2180_MOESM2_ESM.pdf]

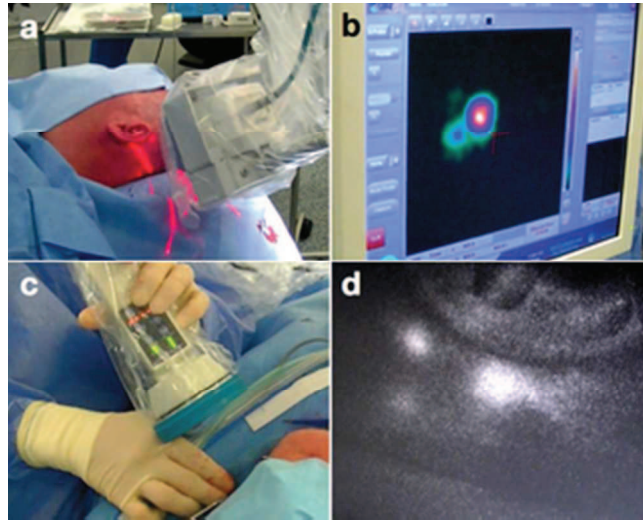

See Table & Figure legends.doc

FIG. S2 Visualization of superficial sentinel nodes through the skin before the incision using the portable gamma camera and the near-infrared fluorescence camera. a, b The portable gamma camera visualizes the radioactive component of the hybrid tracer and depicts three hotspots. c, d Using the fluorescence camera, the fluorescent component of the hybrid tracer in the same nodes is visible through the intact skin  
27x21mm (300 x 300 DPI)
