# Supplementary material for: Feasibility of Sentinel Node Biopsy in Head and Neck Melanoma Using a Hybrid Radioactive and Fluorescent Tracer
Source: PubMed Central journal article supplement — Ann Surg Oncol. 2011 Dec 30;19(6):1988–94. doi: 10.1245/s10434-011-2180-7 (PMC3356513; doi:10.1245/s10434-011-2180-7), 2011-12-30
Supplement: 10434_2011_2180_MOESM3_ESM.pdf [file 10434_2011_2180_MOESM3_ESM.pdf]

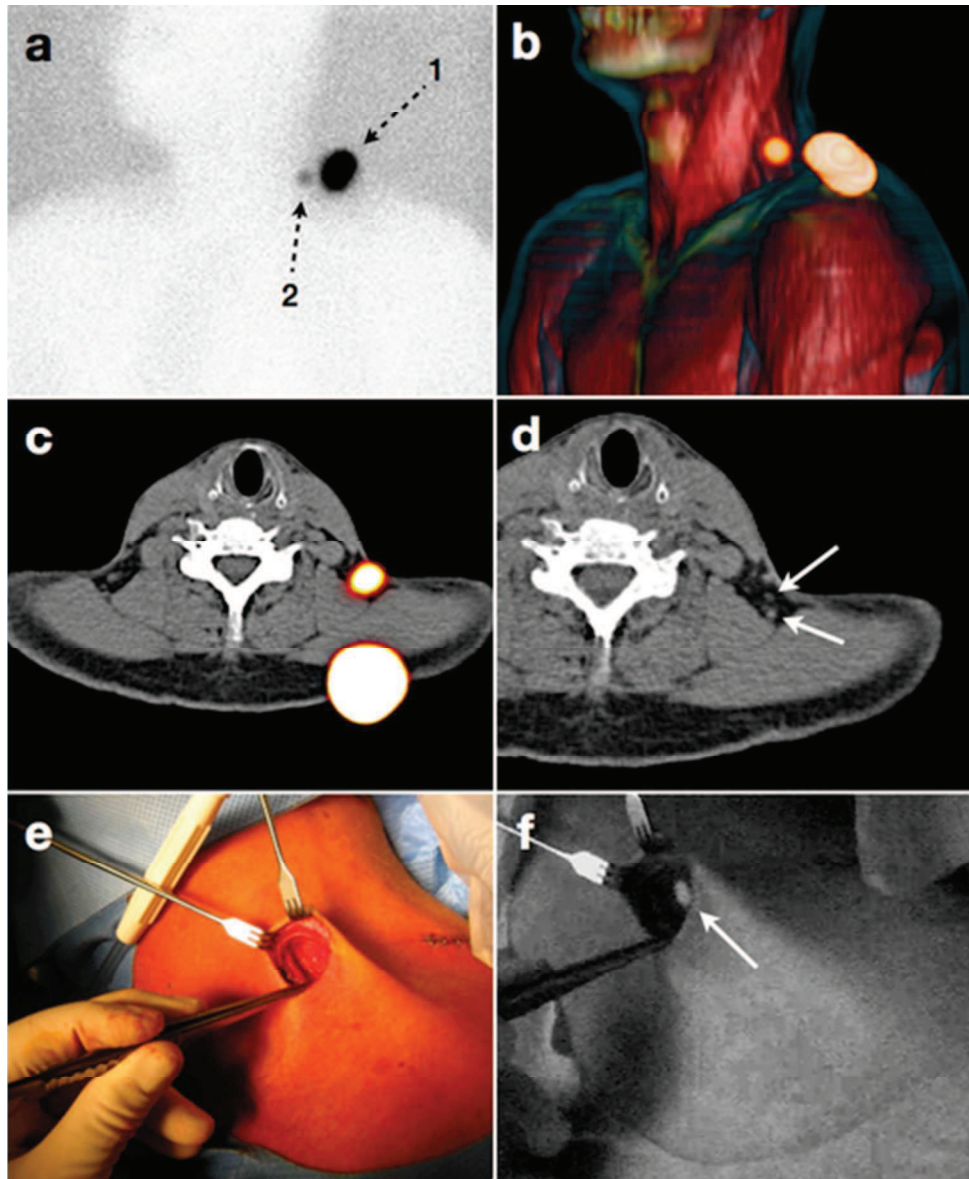

See Table & Figure legends.doc:

FIG. S3 A single hotspot on the lymphoscintigram and SPECT/CT fused images is visible as two separate nodes on the axial CT slices in hindsight, after intraoperative identification of an additional sentinel node with the portable gamma camera (patient 6, Table 1). a Early static lateral preoperative lymphoscintigram ten minutes after peritumoral injection (scapular region, arrow 1) of ICG-99mTc-nanocolloid showing one hotspot in lower neck (arrow 2). b 3D SPECT/CT image 2 hours post injection providing additional anatomical information. c, d The single hotspot on the axial fused SPECT/CT image corresponds to two lymph nodes as visible on the axial CT slice (arrows). e, f After removal of one sentinel node, the additional sentinel node was also identified (arrow) using the near-infrared fluorescence camera 41x49mm (300 x 300 DPI)
